# Supplementary material for: Loss-of-Function Variants in Cytoskeletal Genes Are Associated with Early-Onset Atrial Fibrillation
Source: PubMed Central journal article supplement (PMC7074234; doi:10.3390/jcm9020372), 2020-01-29
Supplement: jcm-09-00372-s001.pdf [file jcm-09-00372-s001.pdf]

## Supplementary Material:

# Loss-of-Function Variants in Cytoskeletal Genes Are Associated with Early-Onset Atrial Fibrillation

Oliver Bundgaard Vad <sup>1,2</sup>, Christian Paludan-Müller <sup>1,2</sup>, Gustav Ahlberg <sup>1,2</sup>,  
Silje Madeleine Kalstø <sup>3</sup>, Jonas Ghouse <sup>1,2</sup>, Laura Andreassen <sup>1,2</sup>, Stig Haunsø <sup>2,4</sup>, Arnljot Tveit <sup>3,5</sup>, Ahmad  
Sajadieh <sup>6</sup>, Ingrid Elisabeth Christophersen <sup>3,7</sup>, Jesper Hastrup Svendsen <sup>2,4</sup> and Morten Salling Olesen <sup>1,2</sup>

<sup>1</sup> Department of Biomedical Sciences, Faculty of Health and Medical Sciences, University of Copenhagen, 2200 Copenhagen N, Denmark;

<sup>2</sup> Laboratory for Molecular Cardiology, Department of Cardiology, Centre for Cardiac, Vascular, Pulmonary and Infectious Diseases, Rigshospitalet, Copenhagen University Hospital, 2100 Copenhagen O, Denmark;

<sup>3</sup> Department of Medical Research, Bærum Hospital, Vestre Viken Hospital Trust, 3004 Drammen, Norway;

<sup>4</sup> Department of Clinical Medicine, Faculty of Health and Medical Sciences, University of Copenhagen, 2200 Copenhagen N, Denmark;

<sup>5</sup> Department of Cardiology, Institute of Clinical Medicine, University of Oslo, 0450 Oslo, Norway;

<sup>6</sup> Department of Cardiology, Copenhagen University Hospital, Bispebjerg, 2400 Copenhagen NV, Denmark;

<sup>7</sup> Department of Medical Genetics, Oslo University Hospital, 0450 Oslo, Norway;

\*Correspondence: mortensol@sund.ku.dk; Tel.: +4535330753

Table of contents:

|                                                                                                                       |                                     |
|-----------------------------------------------------------------------------------------------------------------------|-------------------------------------|
| <b>Table S1</b> Descriptive information on studies used for genetic correlation analysis of AF and other traits ..... | 3                                   |
| <b>Table S2</b> All affected isoforms of <i>DMD</i> , <i>FKTN</i> , and <i>PDLIM3</i> .....                           | 4                                   |
| <b>Table S3</b> Summary of protein-protein interactions of <i>DMD</i> , <i>FKTN</i> , and <i>PDLIM3</i> .....         | 5                                   |
| <b>Figure S1</b> <i>DMD</i> isoform expression.....                                                                   | 6                                   |
| <b>Figure S2</b> <i>FKTN</i> isoform expression .....                                                                 | 7                                   |
| <b>Figure S3</b> <i>PDLIM3</i> isoform expression.....                                                                | 8                                   |
| <b>References</b> .....                                                                                               | <b>Error! Bookmark not defined.</b> |

**Table S1** Descriptive information on studies used for genetic correlation analysis of AF and other traits.

| <b>Trait</b>                | <b>Study</b>                                                                                                                       | <b>No. of participants:</b> | <b>Ancestry of participants</b> | <b>Reference</b> |
|-----------------------------|------------------------------------------------------------------------------------------------------------------------------------|-----------------------------|---------------------------------|------------------|
| Alcohol dependence          | Trans-ancestral GWAS of alcohol dependence reveals common genetic underpinnings with psychiatric disorders                         | 28,757                      | European                        | (1)              |
| Angina                      | <a href="http://www.nealelab.is/uk-biobank/">www.nealelab.is/uk-biobank/</a>                                                       | 337,159                     | European                        | (2)              |
| BMI                         | <a href="http://www.nealelab.is/uk-biobank/">www.nealelab.is/uk-biobank/</a>                                                       | 336,107                     | European                        | (2)              |
| Coronary heart disease      | Identification of 64 novel genetic loci provides an expanded view on the genetic architecture of coronary artery disease           | 400,961                     | European                        | (3)              |
| Depression                  | Meta-analysis of genome-wide association studies for neuroticism in 449,484 individuals identifies novel genetic loci and pathways | 357,957                     | European                        | (4)              |
| Diabetes type 2             | Large-scale association analysis provides insights into the genetic architecture and pathophysiology of type 2 diabetes            | 69,033                      | European                        | (5)              |
| Ever smoked                 | <a href="http://www.nealelab.is/uk-biobank/">www.nealelab.is/uk-biobank/</a>                                                       | 336,067                     | European                        | (2)              |
| Hand grip strength          | <a href="http://www.nealelab.is/uk-biobank/">www.nealelab.is/uk-biobank/</a>                                                       | 335,821                     | European                        | (2)              |
| Heart failure               | Phenotypic refinement of heart failure in a national biobank facilitates genetic discovery                                         | 394,156                     | European                        | (6)              |
| Height                      | <a href="http://www.nealelab.is/uk-biobank/">www.nealelab.is/uk-biobank/</a>                                                       | 336,474                     | European                        | (2)              |
| Hypertension                | <a href="http://www.nealelab.is/uk-biobank/">www.nealelab.is/uk-biobank/</a>                                                       | 361,194                     | European                        | (2)              |
| Non-ischemic cardiomyopathy | Phenotypic refinement of heart failure in a national biobank facilitates genetic discovery                                         | 390,142                     | European                        | (6)              |
| Overall health rating       | <a href="http://www.nealelab.is/uk-biobank/">www.nealelab.is/uk-biobank/</a>                                                       | 336,020                     | European                        | (2)              |

Table S2. All affected isoforms of *DMD*, *FKTN*, and *PDLIM3*.

| Gene            | Genomic Position         | Amino-Acid Change    | RefSNP      | Effect             | Transcript      | Consequence    |
|-----------------|--------------------------|----------------------|-------------|--------------------|-----------------|----------------|
| <i>DMD</i>      | ChrX:31140001_31140013   | delTCTGCCCAAATC<br>A | rs752332058 | Frameshift variant | ENST00000343523 | p.D1113Efs*6   |
|                 |                          |                      |             |                    | ENST00000358062 | p.D1366Efs*6   |
|                 |                          |                      |             |                    | ENST00000359836 | p.D1210Efs*6   |
|                 |                          |                      |             |                    | ENST00000361471 | p.D602Efs*6    |
|                 |                          |                      |             |                    | ENST00000378680 | p.D505Efs*6    |
|                 |                          |                      |             |                    | ENST00000378723 | p.D615Efs*6    |
|                 |                          |                      |             |                    | ENST00000474231 | p.D1223Efs*6   |
| <i>DMD</i>      | ChrX:31196048            | C>T                  | rs145603325 | Splice donor       | ENST00000357033 | c.10262+1G > A |
|                 |                          |                      |             |                    | ENST00000378677 | c.10250+1G > A |
|                 |                          |                      |             |                    | ENST00000378702 | c.1058+1G > A  |
|                 |                          |                      |             |                    | ENST00000378705 | c.632+1G > A   |
|                 |                          |                      |             |                    | ENST00000378707 | c.2882+1G > A  |
|                 |                          |                      |             |                    | ENST00000378723 | c.1058+1G > A  |
| ENST00000474231 | c.2882+1G > A            |                      |             |                    |                 |                |
| <i>FKTN</i>     | Chr9:108358933           | C>T                  | NA          | Nonsense variant   | ENST00000223528 | p.Q54*         |
|                 |                          |                      |             |                    | ENST00000357998 | p.Q54*         |
|                 |                          |                      |             |                    | ENST00000448551 | p.Q54*         |
|                 |                          |                      |             |                    | ENST00000540160 | p.Q54*         |
| <i>PDLIM3</i>   | Chr4:186425651_186425652 | delCA                | NA          | Frameshift variant | ENST00000284770 | p.C294*fs*1    |
|                 |                          |                      |             |                    | ENST00000284771 | p.C246*fs*1    |

**Table S3.** Summary of protein-protein interactions of *DMD*, *FKTN*, and *PDLIM3*.

| <b>Gene</b> | <b>Interaction (confidence score)</b> | <b>Gene</b> | <b>Interaction (confidence score)</b> | <b>Gene</b>   | <b>Interaction (confidence score)</b> |
|-------------|---------------------------------------|-------------|---------------------------------------|---------------|---------------------------------------|
| <i>DMD</i>  | <i>DAG1</i> (0.997)                   | <i>FKTN</i> | <i>FKRP</i> (0.992)                   | <i>PDLIM3</i> | <i>NEB</i> (0.877)                    |
| <i>DMD</i>  | <i>SNTG2</i> (0.989)                  | <i>FKTN</i> | <i>ISPD</i> (0.991)                   | <i>PDLIM3</i> | <i>TNNC2</i> (0.875)                  |
| <i>DMD</i>  | <i>SNTB1</i> (0.987)                  | <i>FKTN</i> | <i>POMK</i> (0.977)                   | <i>PDLIM3</i> | <i>PDLIM7</i> (0.873)                 |
| <i>DMD</i>  | <i>CAV3</i> (0.987)                   | <i>FKTN</i> | <i>POMGNT1</i> (0.958)                | <i>PDLIM3</i> | <i>MYL1</i> (0.866)                   |
| <i>DMD</i>  | <i>SGCD</i> (0.986)                   | <i>FKTN</i> | <i>POMT1</i> (0.952)                  | <i>PDLIM3</i> | <i>CAV3</i> (0.852)                   |
| <i>DMD</i>  | <i>SNTA1</i> (0.982)                  | <i>FKTN</i> | <i>POMT2</i> (0.950)                  | <i>PDLIM3</i> | <i>MYBPC3</i> (0.810)                 |
| <i>DMD</i>  | <i>SGCB</i> (0.979)                   | <i>FKTN</i> | <i>DAG1</i> (0.870)                   | <i>PDLIM3</i> | <i>ACTN2</i> (0.789)                  |
| <i>DMD</i>  | <i>LAMA2</i> (0.977)                  | <i>FKTN</i> | <i>THEM5</i> (0.852)                  | <i>PDLIM3</i> | <i>SRL</i> (0.705)                    |
| <i>DMD</i>  | <i>AGRN</i> (0.975)                   | <i>FKTN</i> | <i>POMGNT2</i> (0.840)                |               |                                       |
| <i>DMD</i>  | <i>TTN</i> (0.972)                    | <i>FKTN</i> | <i>DPM3</i> (0.824)                   |               |                                       |

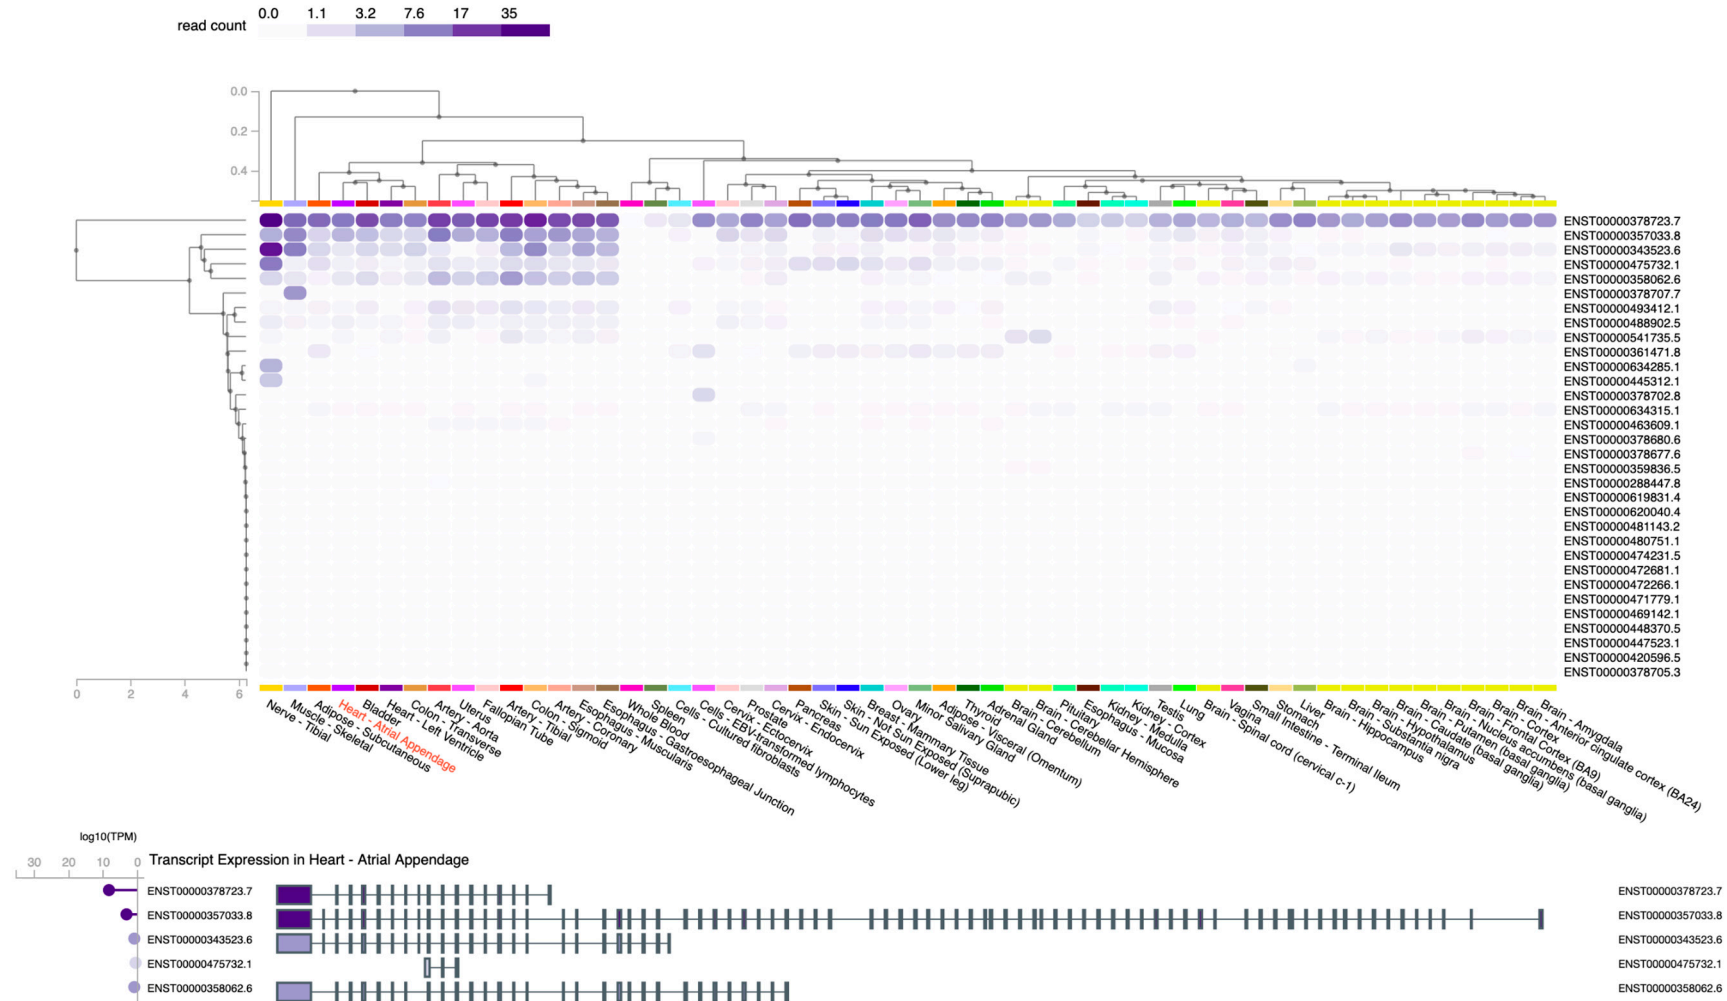

Figure S1. DMD isoform expression.

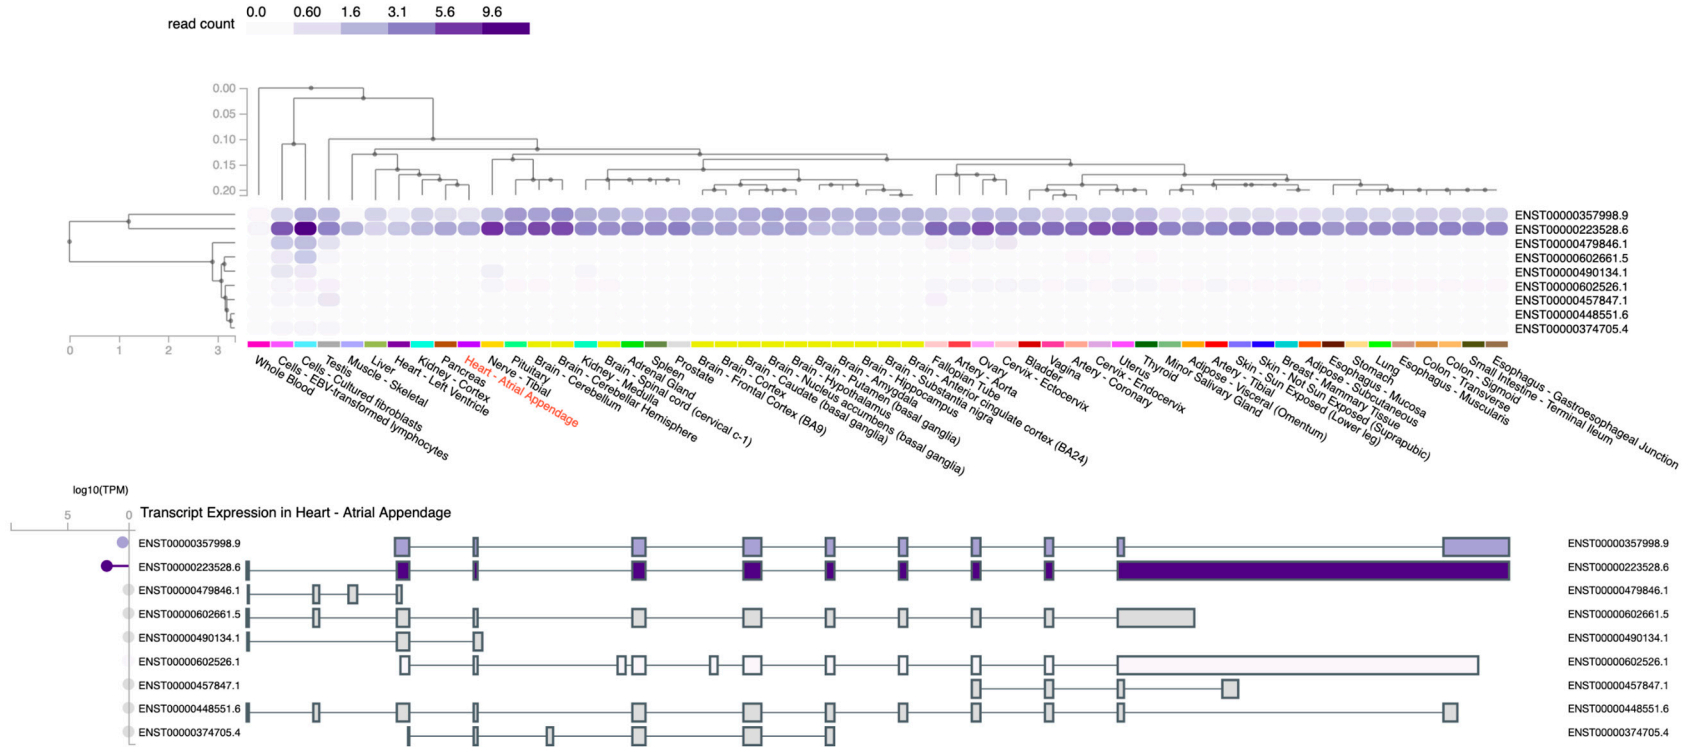

Figure S2. *FKTN* isoform expression.

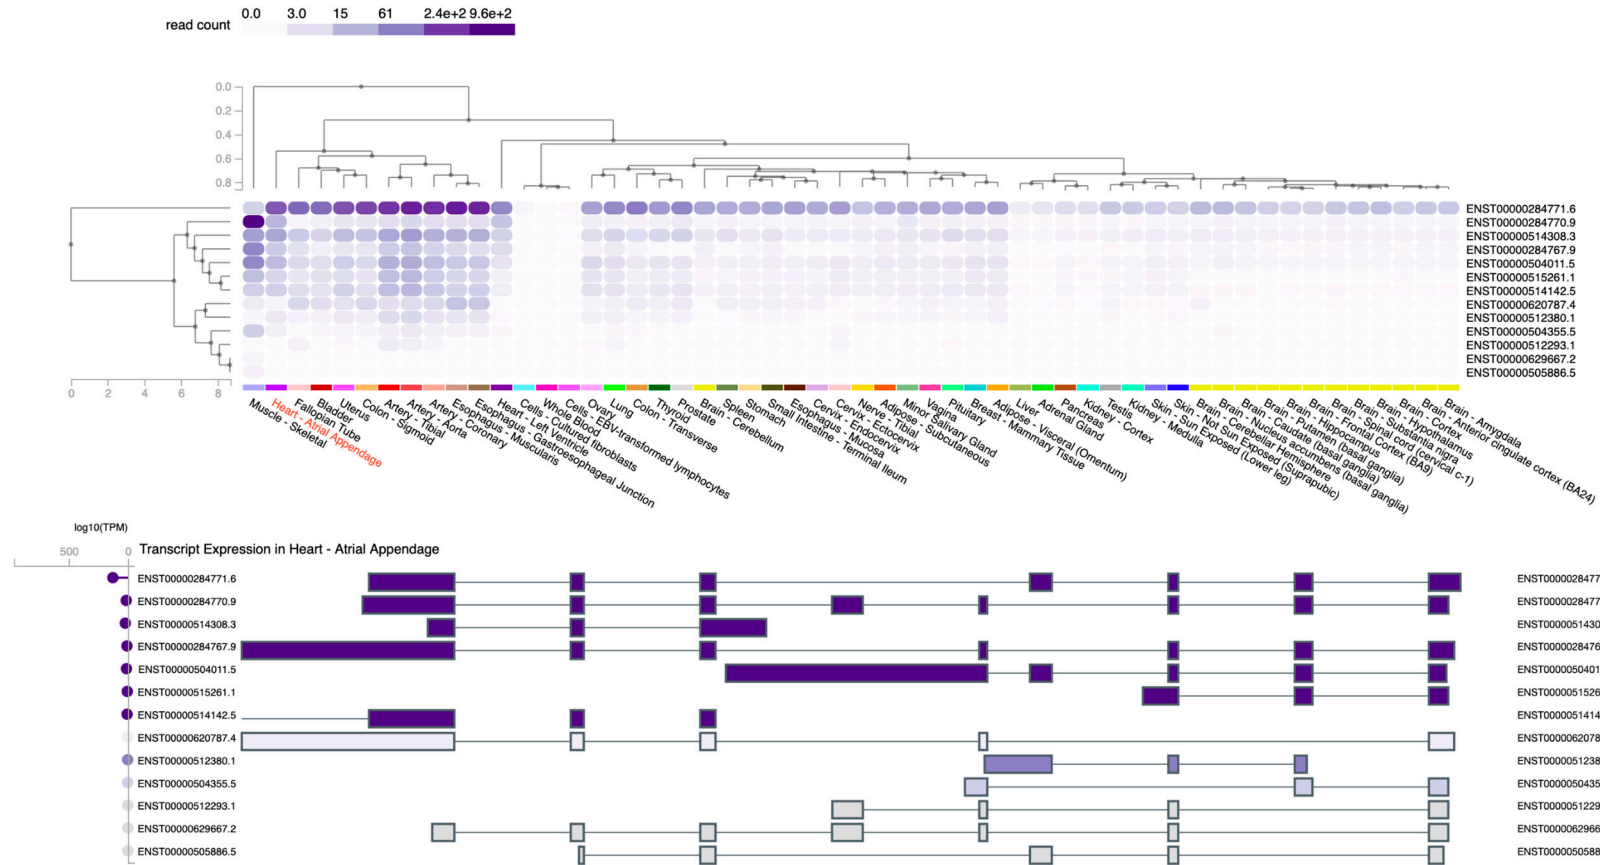

Figure S3. *PDLIM3* isoform expression.



## References

1. McGue, M.; Zhang, Y.; Miller, M.B.; Basu, S.; Vrieze S.; Hicks, B.; Malone, S.; Oetting, W.S.; Iacono, W.G. A genome-wide association study of behavioral disinhibition. *Behav Genet.* **2013** Sep; 43 (5): 363–73.
2. UK Biobank [Internet]. Neale lab. [cited 2019 Dec 9]. Available from: <http://www.nealelab.is/uk-biobank>
3. van der Harst P, Verweij N. Identification of 64 Novel Genetic Loci Provides an Expanded View on the Genetic Architecture of Coronary Artery Disease. *Circ Res.* **2018** 02; 122(3): 433–43.
4. Nagel, M.; Jansen, P.R.; Stringer, S.; Watanabe, K.; de Leeuw, C.A.; Bryois, J.; Savage, J.E.; Hammerschlag, A.R.; Skene, N.G.; Muñoz-Manchado, A.B; et al. Meta-analysis of genome-wide association studies for neuroticism in 449,484 individuals identifies novel genetic loci and pathways. *Nat Genet.* **2018** 50 (7): 920–7.
5. Morris, A.P.; Voight, B.F.; Teslovich, T.M.; Ferreira, T.; Segrè, A.V; Steinthorsdottir, V.; Strawbridge, R.J.; Khan, H.; Grallert, H.; Mahajan, A.; et al. Large-scale association analysis provides insights into the genetic architecture and pathophysiology of type 2 diabetes. *Nat Genet.* **2012** Sep; 44 (9): 981–90.
6. Aragam, K.G.; Chaffin, M.; Levinson, R.T.; McDermott, G.; Choi, S-H.; Shoemaker, M.B.; Haas, M.E.; Weng, L-C.; Lindsay, M.E.; Smith, J.G.; et al. Phenotypic Refinement of Heart Failure in a National Biobank Facilitates Genetic Discovery. *Circulation.* **2018** Nov 11;
